# Supplementary material for: Facile chemical solution synthesis of p-type delafossite Ag-based transparent conducting AgCrO2 films in an open condition
Source: Royal Society of Chemistry journal article supplement (doi:10.1039/c6tc04848j), 2017-01-01
Supplement: c6tc04848j1.pdf [file c6tc04848j1.pdf]

## Electronic Supplementary Information

### Facile Chemical Solution Synthesis in an Open Condition for p-Type Delafossite Ag-based Transparent Conducting AgCrO<sub>2</sub> Films

Renhuai Wei,<sup>a</sup> Xianwu Tang,<sup>a</sup> Ling Hu,<sup>a</sup> Jie Yang,<sup>a</sup> Xiaoguang Zhu,<sup>a</sup> Wenhai Song,<sup>a</sup> Jianming Dai,<sup>a</sup> Xuebin Zhu<sup>\*a</sup>, and Yuping Sun<sup>\*abc</sup>

<sup>a</sup> Key Laboratory of Materials Physics, Institute of Solid State Physics, Chinese Academy of Sciences, Hefei 230031, China.

<sup>b</sup> High Magnetic Field Laboratory, Chinese Academy of Sciences, Hefei 230031, China.

<sup>c</sup> Collaborative Innovation Centre of Advanced Microstructures, Nanjing University, Nanjing 210093, China.

\*E-mail: xbzhu@issp.ac.cn (X.Z), ypsun@issp.ac.cn (Y.S)

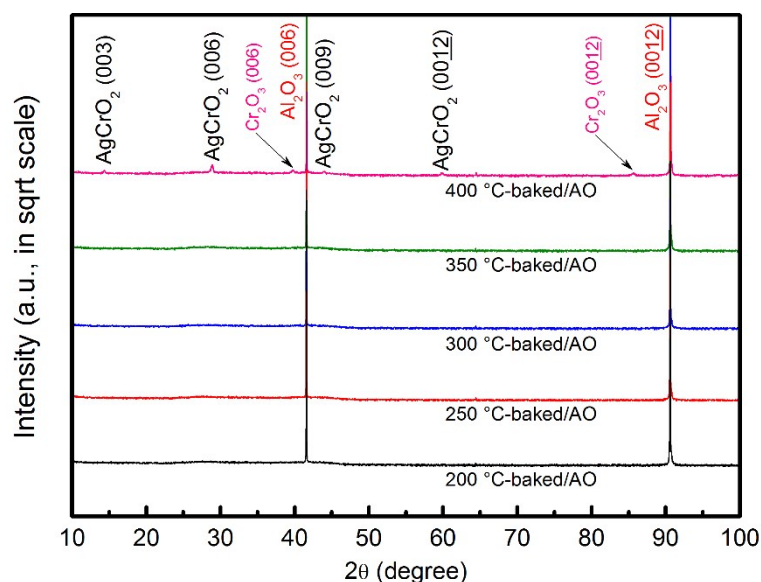

**Figure S1.** XRD patterns for all baked thin films on single crystal Al<sub>2</sub>O<sub>3</sub> substrates.

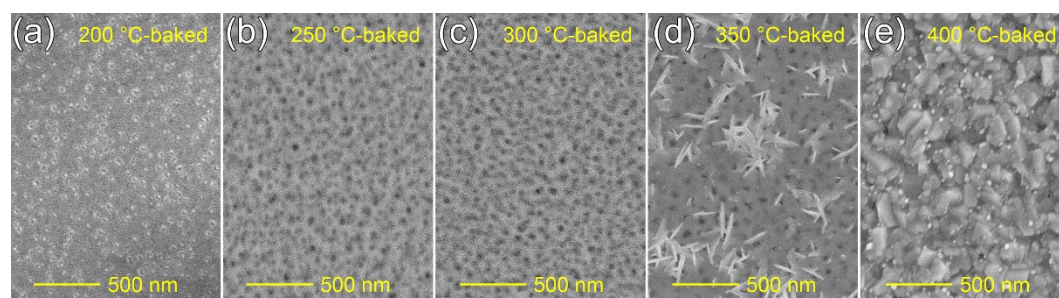

**Figure S2.** FE-SEM images for solution-derived thin films baked at different temperatures.

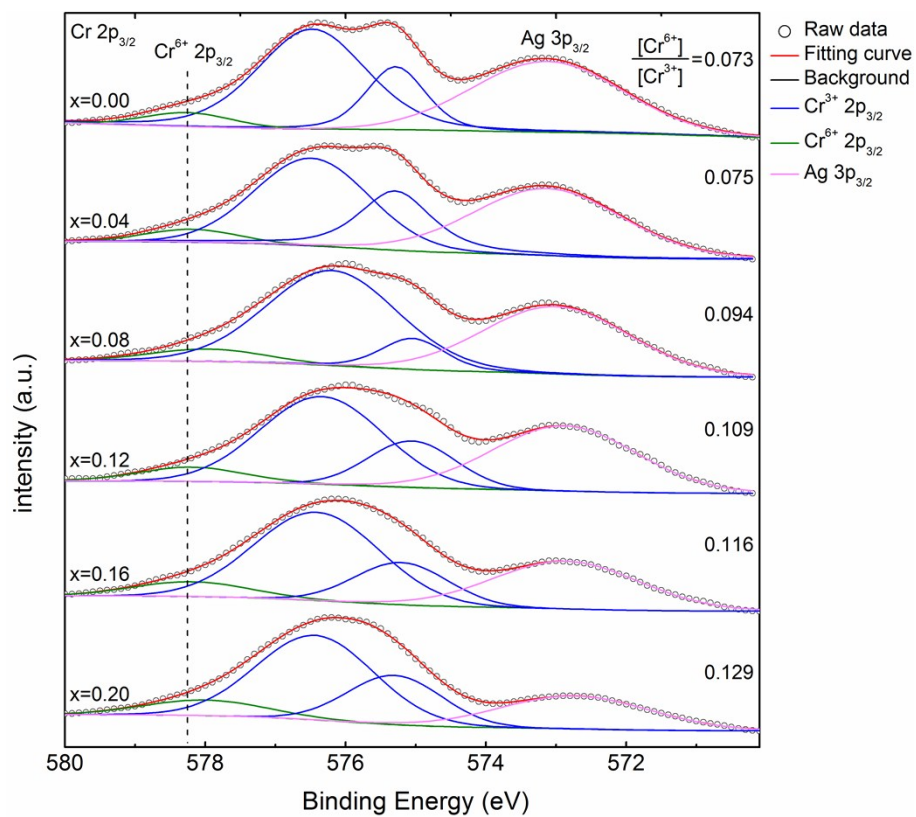

**Figure S3.** Peak deconvolution results about XPS of Cr  $2p_{3/2}$  of all Mg-doped  $AgCrO_2$  thin films.
